# Supplementary material for: A novel method of lateral closing wedge osteotomy for cubitus varus deformity in children
Source: BMC Surg. 2022 Nov 24;22:408. doi: 10.1186/s12893-022-01854-y (PMC9701051; doi:10.1186/s12893-022-01854-y)
Supplement: Supplementary file 2 — Additional file 2: Clinical data: patients’ demographic characteristics, evaluation details. [file 12893_2022_1854_MOESM2_ESM.xls]

## Sheet: 后天肘内翻
				Patients’ demographic characteristics, evaluation details
ID	Resident ID	Name	Department	Sex	age	DOB	Diagnosis	Operation Method	Operation Time	Chief Operator	Corresponding
961089	9620342	Haipeng ZU	Orthopedic Department 2	Male	9	2006-07-23	Right Elbow cubitus varus	leteral ostetomy and K-wires	2016-01-29	Guoxin Nan	Guoqiang Zu
974314	9803392	Ziyi Yang	Orthopedic Department 2	Female	5	2010-12-17	Right Elbow cubitus varus	Right leteral ostetomy and K-wires	2016-04-18	Guoxin Nan	Junlin Yao
990548	12642328	Yujie Tan	Orthopedic Department 2	Male	3	2012-10-02	Left Elbow cubitus varus	leteral ostetomy and K-wires	2016-07-20	Guoxin Nan	Jian Tan
872318	9155627	Liang Yan	Orthopedic Department 2	Male	10	2006-05-09	Left Elbow cubitus varus	leteral ostetomy and K-wires	2016-07-25	Guoxin Nan	Qingguo Yan
991658	9916662	Yunxi Zhangxing	Orthopedic Department 2	Male	6	2009-08-07	Left Elbow cubitus varus	leteral ostetomy and K-wires	2016-07-26	Guoxin Nan	Jun Zhang
991881	12648838	Yiling Wang	Orthopedic Department 2	Female	13	2002-08-03	Right Elbow cubitus varus	leteral ostetomy and K-wires	2016-07-29	Guoxin Nan	Yulin Wang
993867	12735555	Jinhao Gan	Orthopedic Department 2	Male	12	2004-07-16	Left Elbow cubitus varus	leteral ostetomy and K-wires	2016-08-09	Guoxin Nan	Yuanchuan Gan
996121	12700210	Liang Ding	Orthopedic Department 2	Male	12	2004-05-19	Left Elbow cubitus varus	leteral ostetomy and K-wires	2016-08-22	Guoxin Nan	Zhaoke Ding
1049473	13084747	Caiyu Liu	Orthopedic Department 2	Female	11	2005-07-14	Right Elbow cubitus varus	leteral ostetomy and K-wires	2017-07-05	Guoxin Nan	Junyi Liu
1050912	13308096	Ziming Wang	Orthopedic Department 2	Male	10	2007-02-08	Right Elbow cubitus varus	leteral ostetomy and K-wires	2017-07-12	Guoxin Nan	Dechun Wang
1051658	13286882	Junyu Zhang	Orthopedic Department 2	Male	8	2008-08-04	Left Elbow cubitus varus	leteral ostetomy and K-wires	2017-07-18	Guoxin Nan	Hongjun Zhang
1052203	12655170	Zixuan Zeng	Orthopedic Department 2	Male	6	2010-10-29	Left Elbow cubitus varus	leteral ostetomy and K-wires	2017-07-20	Guoxin Nan	Shaojie Zeng
1055601	13304485	Zhidong Wang	Orthopedic Department 2	Male	11	2006-07-17	Left Elbow cubitus varus	leteral ostetomy and K-wires	2017-08-09	Guoxin Nan	Kaichou Wang
1057283	14010600	Xuanhui Hou	Orthopedic Department 2	Male	7	2009-11-22	Left Elbow cubitus varus	leteral ostetomy and K-wires	2017-08-17	Guoxin Nan	Haijun Luo
1061437	12703883	Jisong Li	Orthopedic Department 2	Male	5	2011-11-14	Right Elbow cubitus varus	leteral ostetomy and K-wires	2017-09-13	Guoxin Nan	Muke Li
1062809	13460994	Mingxin Ma	Orthopedic Department 2	Male	5	2012-03-04	Right Elbow cubitus varus	leteral ostetomy and K-wires	2017-09-20	Guoxin Nan	Zhengshu Xiong
1071529	14145988	Yichen Zhang	Orthopedic Department 2	Male	3	2014-02-05	Right Elbow cubitus varus	leteral ostetomy and K-wires	2017-11-07	Guoxin Nan	Qihu Zhang
1075088	14180181	Zihan Zhang	Orthopedic Department 2	Male	5	2012-05-08	Right Elbow cubitus varus	leteral ostetomy and K-wires	2017-11-27	Guoxin Nan	Xueqin Tang
1079919	14245746	Xujie Wang	Orthopedic Department 2	Male	10	2007-06-22	Left Elbow cubitus varus	leteral ostetomy and K-wires	2017-12-26	Guoxin Nan	Yin Wang
1080331	14261583	Lei Hu	Orthopedic Department 2	Male	13	2004-06-06	Right Elbow cubitus varus	leteral ostetomy and K-wires	2017-12-27	Guoxin Nan	Kailin Hu
961571	12358811	Jiyuan Zhou	Orthopedic Department 2	Female	9	2006-08-28	Left Elbow cubitus varus	leteral ostetomy and K-wires	2016-02-01	Zhongliang Wang	Shicai Zhou
974577	8035529	Yiye TU	Orthopedic Department 2	Male	6	2009-12-08	Right Elbow cubitus varus	leteral ostetomy and K-wires	2016-04-20	Zhongliang Wang	Henwei Tu
979289	9516211	Wenlin Lai	Orthopedic Department 2	Male	3	2012-09-13	Left Elbow cubitus varus	leteral ostetomy and K-wires	2016-05-16	Zhongliang Wang	Zhigang Lai
990790	9172452	Junhao Chen	Orthopedic Department 2	Male	10	2006-07-02	Right Elbow cubitus varus	leteral ostetomy and K-wires	2016-07-21	Zhongliang Wang	Xiaogang Chen
991304	12694814	Xueqin Li	Orthopedic Department 2	Female	10	2005-11-03	Right Elbow cubitus varus	leteral ostetomy and K-wires	2016-07-25	Zhongliang Wang	Jianbo LI
992267	12710085	Meng Chen	Orthopedic Department 2	Female	12	2003-12-05	Left Elbow cubitus varus	leteral ostetomy and K-wires	2016-07-29	Zhongliang Wang	Zaitian Chen
994558	12708082	Huaping LI	Orthopedic Department 2	male	2	2013-08-14	Right Elbow cubitus varus	leteral ostetomy and K-wires	2016-08-12	Zhongliang Wang	Yunli Li
1018851	12955654	Yating Zeng	Orthopedic Department 2	Female	5	2011-05-14	Left Elbow cubitus varus	leteral ostetomy and K-wires	2017-01-04	Zhongliang Wang	Hongliang Zeng
1036469	13120885	Ziyi Zhou	Orthopedic Department 2	Male	9	2008-02-12	Right Elbow cubitus varus	leteral ostetomy and K-wires	2017-04-19	Zhongliang Wang	Xiaoli Su
1053276	13208695	Xinlin Yu	Orthopedic Department 2	Male	7	2009-08-09	Left Elbow cubitus varus	leteral ostetomy and K-wires	2017-07-26	Zhongliang Wang	Zhaokun Yu
1053838	12103174	Qainzheng Li	Orthopedic Department 2	Male	7	2010-01-16	Right Elbow cubitus varus	leteral ostetomy and K-wires	2017-07-31	Zhongliang Wang	Gen LI
1054154	13325534	Yue Zhang	Orthopedic Department 2	Female	12	2005-01-11	Left Elbow cubitus varus	leteral ostetomy and K-wires	2017-08-01	Zhongliang Wang	Keming Zhang
1054645	13200108	Xinyi Chen	Orthopedic Department 2	Female	4	2012-11-29	Right Elbow cubitus varus	leteral ostetomy and K-wires	2017-08-03	Zhongliang Wang	Gang Chen
1054750	12660713	Tao Chen	Orthopedic Department 2	Male	7	2009-08-14	Left Elbow cubitus varus	leteral ostetomy and K-wires	2017-08-03	Zhongliang Wang	Qingde Chen
1055900	13343754	Changlin Li	Orthopedic Department 2	Male	12	2005-06-26	Left Elbow cubitus varus	leteral ostetomy and K-wires	2017-08-09	Zhongliang Wang	Lianhai Li
1056155	14052420	Haifeng Wu	Orthopedic Department 2	Male	5	2012-07-26	Left Elbow cubitus varus	leteral ostetomy and K-wires	2017-08-11	Zhongliang Wang	Zhiming WU
1058504	14031360	Linyang Liu	Orthopedic Department 2	Male	11	2006-03-22	Left Elbow cubitus varus	leteral ostetomy and K-wires	2017-08-24	Zhongliang Wang	Xue Liu
1061439	13359218	Yang Ren	Orthopedic Department 2	Male	6	2011-09-04	Right Elbow cubitus varus	leteral ostetomy and K-wires	2017-09-12	Zhongliang Wang	Shihua Ren
1066433	14086693	BO Yang	Orthopedic Department 2	Male	6	2011-04-17	Left Elbow cubitus varus	leteral ostetomy and K-wires	2017-10-09	Zhongliang Wang	Qingfu Yang
1071574	14123811	Xuanyu ZUO	Orthopedic Department 2	Male	3	2014-03-02	Left Elbow cubitus varus	leteral ostetomy and K-wires	2017-11-08	Zhongliang Wang	Fei zuo
1023985	13012377	Feng Zheng	Orthopedic Department 2	Female	14	2002-10-31	Right Elbow cubitus varus	leteral ostetomy and K-wires	2017-02-07	Zhongliang Wang	Fabing Zheng
